# Supplementary material
Source: publisher figshare collection journal article supplement (https://acs.figshare.com/ndownloader/files/14897324)
Supplement: Supplementary file 1 [file 14897324]

# **Supporting information**

## **Photocrosslinking Patterning of Single-Layered Polymer Actuators for Controllable Motility and Automatic Devices**

Jiang Wei, Xiaxin Qiu, Lidong Zhang\*

Prof. L. D. Zhang, Mr. J. Wei, Miss X. Qiu

School of Chemistry and Molecular Engineering, East China Normal University,  
Shanghai, 200241, People's Republic of China. E-mail:ldzhang@chem.ecnu.edu.cn

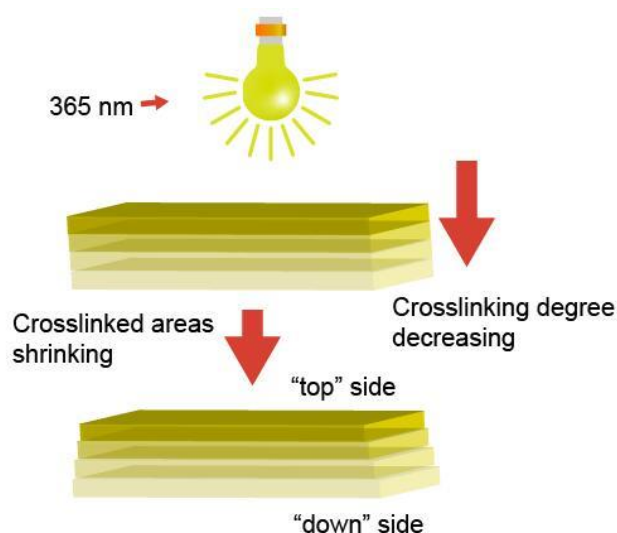

**Figure S1.** A sketch showing the definition of “top” side and “down” side of the photocrosslinking PVDF@PAM film.

### Legends for Supplementary Movies

**Movie S1.** Strips that were cut out with the soft-hard patterns aligned at  $+30^\circ$ ,  $+45^\circ$  and  $+60^\circ$  to the long axis, demonstrated different variations of the coiling pitches in response to acetone vapor sorption and desorption. The video was shown at two times the real speed.

**Movie S2.** The soft-to-hard patterning ratio effects on the coiling motions. The video was shown at two times the real speed.

**Movie S3.** Motion of a homemade artificial hand that was composed of the patterned strip of PVDF@PAM. The video was shown at two times the real speed.

**Movie S4.** Demonstration on the acetone vapor-induced contraction. The video was shown at ten times the real speed.

**Movie S5.** An automatic device driven by acetone vapor-induced contraction and expansion of the patterning strip of PVDF@PAM. The video was shown at fifteen times the real speed.

**Movie S6.** A 3.5 mg strip worked in the automatic device capable of lifting 5.09 g weights to a height of 3.33 cm. The video was shown at ten times the real speed.
